# Supplementary material for: Description and genome analysis of Aoguangibacterium sediminis gen. nov., sp. nov., a noval denitrifying and carbon-fixing bacterium isolated from marine sediment
Source: Research Square preprint supplement (doi:10.21203/rs.3.rs-1648654/v1), 2022-05-17
Supplement: Supplementary file 1 [file 638d49821573b4031f614dff.xlsx]

## Sheet: Sheet1
Supplementary Table S1
List of 16S rRNA gene sequences used in the analysis of the environmental distribution of D16 and related members of the family Flavobacteriaceae. For each sequence the assigned clade, accession number, source of isolation and deduced habitat is shown.
Clade	Acc. No.	Isolation Source	Habitat
D16(Aoguangarchaeum )	JN532772	Guerrero Negro Hypersaline Mat 10; altitude 310m AMSL; sample depth 1m below water level, 34-49mm depth into the mat	Salinewater sedimnets,mats and soil
D16(Aoguangarchaeum )	JN533743	Guerrero Negro Hypersaline Mat 10; altitude 310m AMSL; sample depth 1m below water level, 34-49mm depth into the mat	Salinewater sedimnets,mats and soil
D16(Aoguangarchaeum )	JN535678	Guerrero Negro Hypersaline Mat 10; altitude 310m AMSL; sample depth 1m below water level, 34-49mm depth into the mat	Salinewater sedimnets,mats and soil
D16(Aoguangarchaeum )	JN536381	Guerrero Negro Hypersaline Mat 10; altitude 310m AMSL; sample depth 1m below water level, 34-49mm depth into the mat	Salinewater sedimnets,mats and soil
D16(Aoguangarchaeum )	JF421167	petroleum-contaminated saline-alkali soil with phytoremediation	Salinewater sedimnets,mats and soil
D16(Aoguangarchaeum )	JF789265	marine sediment	Marine sediments
D16(Aoguangarchaeum )	JF789302	marine sediment	Marine sediments
D16(Aoguangarchaeum )	JN038261	petroleum-contaminated soil	Hydrocarbon polluted sediments and soil
D16(Aoguangarchaeum )	JN530872	Guerrero Negro Hypersaline Mat 10; altitude 310m AMSL; sample depth 1m below water level, 34-49mm depth into the mat	Salinewater sedimnets,mats and soil
D16(Aoguangarchaeum )	JN531926	Guerrero Negro Hypersaline Mat 10; altitude 310m AMSL; sample depth 1m below water level, 34-49mm depth into the mat	Salinewater sedimnets,mats and soil
D16(Aoguangarchaeum )	JN532772	Guerrero Negro Hypersaline Mat 10; altitude 310m AMSL; sample depth 1m below water level, 34-49mm depth into the mat	Salinewater sedimnets,mats and soil
D16(Aoguangarchaeum )	JN533743	Guerrero Negro Hypersaline Mat 10; altitude 310m AMSL; sample depth 1m below water level, 34-49mm depth into the mat	Salinewater sedimnets,mats and soil
D16(Aoguangarchaeum )	JN535678	Guerrero Negro Hypersaline Mat 10; altitude 310m AMSL; sample depth 1m below water level, 34-49mm depth into the mat	Salinewater sedimnets,mats and soil
D16(Aoguangarchaeum )	JN536381	Guerrero Negro Hypersaline Mat 10; altitude 310m AMSL; sample depth 1m below water level, 34-49mm depth into the mat	Salinewater sedimnets,mats and soil
D16(Aoguangarchaeum )	JN536954	Guerrero Negro Hypersaline Mat 10; altitude 310m AMSL; sample depth 1m below water level, 34-49mm depth into the mat	Salinewater sedimnets,mats and soil
D16(Aoguangarchaeum )	JN537432	Guerrero Negro Hypersaline Mat 10; altitude 310m AMSL; sample depth 1m below water level, 34-49mm depth into the mat	Salinewater sedimnets,mats and soil
D16(Aoguangarchaeum )	JN537680	Guerrero Negro Hypersaline Mat 10; altitude 310m AMSL; sample depth 1m below water level, 34-49mm depth into the mat	Salinewater sedimnets,mats and soil
D16(Aoguangarchaeum )	JN539442	Guerrero Negro Hypersaline Mat 10; altitude 310m AMSL; sample depth 1m below water level, 34-49mm depth into the mat	Salinewater sedimnets,mats and soil
D16(Aoguangarchaeum )	JN539550	Guerrero Negro Hypersaline Mat 10; altitude 310m AMSL; sample depth 1m below water level, 34-49mm depth into the mat	Salinewater sedimnets,mats and soil
D16(Aoguangarchaeum )	JN684333	salt marsh sediment	Salinewater sedimnets,mats and soil
D16(Aoguangarchaeum )	JN684410	salt marsh sediment	Salinewater sedimnets,mats and soil
D16(Aoguangarchaeum )	JN684478	salt marsh sediment	Salinewater sedimnets,mats and soil
D16(Aoguangarchaeum )	JN684513	salt marsh sediment	Salinewater sedimnets,mats and soil
D16(Aoguangarchaeum )	JN684528	salt marsh sediment	Salinewater sedimnets,mats and soil
D16(Aoguangarchaeum )	JN839079	sediment from marine shallow water hydrothermal system	Marine sediments
D16(Aoguangarchaeum )	JQ257914	tropical marine sediment from jetty, around 10.4m water depth	Marine sediments
D16(Aoguangarchaeum )	JQ370439	FACE soil sample	Freshwater sedimnets,mats and soil
D16(Aoguangarchaeum )	JQ370486	FACE soil sample	Freshwater sedimnets,mats and soil
D16(Aoguangarchaeum )	JQ407943	horizontal subsurface flow constructed wetland treating domestic wastewaters	Wastewater
D16(Aoguangarchaeum )	JQ408031	horizontal subsurface flow constructed wetland treating domestic wastewaters	Wastewater
D16(Aoguangarchaeum )	JQ408088	horizontal subsurface flow constructed wetland treating domestic wastewaters	Wastewater
D16(Aoguangarchaeum )	JQ579696	sediments from Figueiras Beach	Marine sediments
D16(Aoguangarchaeum )	JQ579726	sediments from Figueiras Beach	Marine sediments
D16(Aoguangarchaeum )	JQ579878	sediments from Figueiras Beach	Marine sediments
D16(Aoguangarchaeum )	JQ579990	sediments from Figueiras Beach	Marine sediments
D16(Aoguangarchaeum )	JQ580053	sediments from Figueiras Beach	Marine sediments
D16(Aoguangarchaeum )	JQ580062	sediments from Figueiras Beach	Marine sediments
D16(Aoguangarchaeum )	JQ580147	sediments from Rodas Beach polluted with crude oil	Hydrocarbon polluted sediments and soil
D16(Aoguangarchaeum )	JQ580184	sediments from Rodas Beach polluted with crude oil	Hydrocarbon polluted sediments and soil
D16(Aoguangarchaeum )	JQ580188	sediments from Rodas Beach polluted with crude oil	Hydrocarbon polluted sediments and soil
D16(Aoguangarchaeum )	JQ716330	soil	Freshwater sedimnets,mats and soil
D16(Aoguangarchaeum )	JQ800694	soil	Freshwater sedimnets,mats and soil
D16(Aoguangarchaeum )	JQ800704	soil	Freshwater sedimnets,mats and soil
D16(Aoguangarchaeum )	JQ800741	soil	Freshwater sedimnets,mats and soil
D16(Aoguangarchaeum )	JQ800801	soil	Freshwater sedimnets,mats and soil
D16(Aoguangarchaeum )	JQ801035	soil	Freshwater sedimnets,mats and soil
D16(Aoguangarchaeum )	JX041761	beach sediment	Marine sediments
D16(Aoguangarchaeum )	JX041783	beach sediment	Marine sediments
D16(Aoguangarchaeum )	JX854381	Sylt, West Beach	Marine sediments
D16(Aoguangarchaeum )	JX854382	Sylt, West Beach	Marine sediments
D16(Aoguangarchaeum )	JX854383	Sylt, West Beach	Marine sediments
D16(Aoguangarchaeum )	JX926059	intestinal flora	Marine animal
D16(Aoguangarchaeum )	KC432052	wetland	Freshwater sedimnets,mats and soil
D16(Aoguangarchaeum )	KC432199	wetland	Freshwater sedimnets,mats and soil
D16(Aoguangarchaeum )	KC432263	wetland	Freshwater sedimnets,mats and soil
D16(Aoguangarchaeum )	KC432309	wetland	Freshwater sedimnets,mats and soil
D16(Aoguangarchaeum )	KC432322	wetland	Freshwater sedimnets,mats and soil
D16(Aoguangarchaeum )	KC432444	wetland	Freshwater sedimnets,mats and soil
D16(Aoguangarchaeum )	KC432456	wetland	Freshwater sedimnets,mats and soil
D16(Aoguangarchaeum )	KC432505	wetland	Freshwater sedimnets,mats and soil
D16(Aoguangarchaeum )	KF624252	suboxic pyrite-particle colonization experiment, Janssand tidal flat, Wadden Sea	Heavy metal polluted sediments and soil
D16(Aoguangarchaeum )	KF624255	suboxic pyrite-particle colonization experiment, Janssand tidal flat, Wadden Sea	Heavy metal polluted sediments and soil
D16(Aoguangarchaeum )	KF995128	seawater desalination plant	Seawater
D16(Aoguangarchaeum )	KJ081625	copper contaminated soil	Heavy metal polluted sediments and soil
D16(Aoguangarchaeum )	KT784366	rhizosphere soil	Freshwater sedimnets,mats and soil
D16(Aoguangarchaeum )	KT784787	rhizosphere soil	Freshwater sedimnets,mats and soil
D16(Aoguangarchaeum )	KT980473	endolithic community of Mono Island; collected March 11-14	Marine sediments
D16(Aoguangarchaeum )	KU051413	sea water	Seawater
D16(Aoguangarchaeum )	KU353874	seaweed (Asparagopsis)	Marine plants
D16(Aoguangarchaeum )	KU618898	seaweed (Asparagopsis)	Marine plants
D16(Aoguangarchaeum )	KU622025	seaweed (Asparagopsis)	Marine plants
D16(Aoguangarchaeum )	KU633747	seaweed (Asparagopsis)	Marine plants
D16(Aoguangarchaeum )	KU667250	estuary sediment	Freshwater sedimnets,mats and soil
D16(Aoguangarchaeum )	KU828242	sediment from Bay of Bengal hypoxic zones located in Off Paradip region	Marine sediments
D16(Aoguangarchaeum )	KU828243	sediment from Bay of Bengal hypoxic zones located in Off Paradip region	Marine sediments
D16(Aoguangarchaeum )	KU828684	sediment from Bay of Bengal hypoxic zones located in Off Paradip region	Marine sediments
D16(Aoguangarchaeum )	KU828685	sediment from Bay of Bengal hypoxic zones located in Off Paradip region	Marine sediments
D16(Aoguangarchaeum )	KU828686	sediment from Bay of Bengal hypoxic zones located in Off Paradip region	Marine sediments
D16(Aoguangarchaeum )	KU828687	sediment from Bay of Bengal hypoxic zones located in Off Paradip region	Marine sediments
D16(Aoguangarchaeum )	KU828688	sediment from Bay of Bengal hypoxic zones located in Off Paradip region	Marine sediments
D16(Aoguangarchaeum )	KU830058	sediment from Bay of Bengal hypoxic zones located in Off Paradip region	Marine sediments
D16(Aoguangarchaeum )	KU830865	sediment from Bay of Bengal hypoxic zones located in Off Paradip regio	Marine sediments
D16(Aoguangarchaeum )	KX603389	Coast of Barcelona	Marine sediments
D16(Aoguangarchaeum )	KX626725	rhizoshere soil	Freshwater sediments,mats and soil
D16(Aoguangarchaeum )	KX626860	rhizoshere soil	Freshwater sediments,mats and soil
D16(Aoguangarchaeum )	KX626864	rhizoshere soil	Freshwater sediments,mats and soil
D16(Aoguangarchaeum )	KX626970	rhizoshere soil	Freshwater sediments,mats and soil
D16(Aoguangarchaeum )	KX627340	rhizoshere soil	Freshwater sediments,mats and soil
D16(Aoguangarchaeum )	KX627395	rhizoshere soil	Freshwater sediments,mats and soil
D16(Aoguangarchaeum )	KX627472	rhizoshere soil	Freshwater sediments,mats and soil
D16(Aoguangarchaeum )	KX627658	rhizoshere soil	Freshwater sediments,mats and soil
D16(Aoguangarchaeum )	KX627663	rhizoshere soil	Freshwater sediments,mats and soil
D16(Aoguangarchaeum )	KX627772	rhizoshere soil	Freshwater sediments,mats and soil
D16(Aoguangarchaeum )	KX627792	rhizoshere soil	Freshwater sediments,mats and soil
D16(Aoguangarchaeum )	KY577456	Orbicella faveolata with black band disease	Marine animal
D16(Aoguangarchaeum )	KY578783	Orbicella faveolata with black band disease	Marine animal
D16(Aoguangarchaeum )	LK937129	river sediment	Freshwater sediments,mats and soil
D16(Aoguangarchaeum )	LK937146	river sediment	Freshwater sediments,mats and soil
D16(Aoguangarchaeum )	LT170257	host hemolymph	Marine animal
Eudoraea	AB116429	marine sediment	marine sediment
Eudoraea	AB241031	benthic infaunal burrow wall of Niida River	Freshwater sediments,mats and soil
Eudoraea	AB374871	solid suldge	Freshwater sediments,mats and soil
Eudoraea	KJ150297	fish farm sediment	marine sediment
Eudoraea	AB430177	marine sediment	marine sediment
Eudoraea	AB559970	marine sediments	marine sediment
Eudoraea	AB734585	deep-sea surface sediment	marine sediment
Eudoraea	AM040137	sandy sediments	Marine sediment
Eudoraea	AM501867	Lagoon sediment	Freshwater sediments,mats and soil
Eudoraea	AM745437	sea water	Sea water
Eudoraea	AM945588	sea water	Sea water
Eudoraea	AM945589	sea water	Sea water
Eudoraea	AY133382	coastal Antarctic sediment	Marine sediment
Eudoraea	AY177724	German Wadden Sea	Marine sediment
Eudoraea	AY500045	marine sediment	Marine sediment
Eudoraea	AY500046	marine sediment	Marine sediment
Eudoraea	AY665448	marine sediment	Marine sediment
Eudoraea	AY665449	marine sediment	Marine sediment
Eudoraea	AY665450	marine sediment	Marine sediment
Eudoraea	AY710845	sediment 8-9cm collected	Marine sediment
Eudoraea	AY897272	marine benthos	Marine animal
Eudoraea	DQ080960	German Wadden Sea; particle-attached fraction	Marine sediments
Eudoraea	DQ334629	heavy metal polluted marine sediment	Heavy metal polluted sediments and soil
Eudoraea	KX177802	stainless steel - water column	Freshwater
Eudoraea	KR825123	Janssand tidal subsurface sediment, 490 cmbsf	Marine sediments
Eudoraea	KR825120	Janssand tidal subsurface sediment, 490 cmbsf	Marine sediments
Eudoraea	KR825079	Janssand tidal subsurface sediment, 490 cmbsf	Marine sediments
Eudoraea	KR825018	Janssand tidal subsurface sediment, 200 cmbsf	Marine sediments
Eudoraea	KF268850	marine sediment	Marine sediments
Eudoraea	JQ661211	soil	Freshwater sediments,mats and soil
Eudoraea	JQ661210	soil	Freshwater sediments,mats and soil
Eudoraea	JQ661034	soil	Freshwater sediments,mats and soil
Eudoraea	JQ661008	soil	Freshwater sediments,mats and soil
Eudoraea	JQ661006	soil	Freshwater sediments,mats and soil
Eudoraea	JQ660976	soil	Freshwater sediments,mats and soil
Eudoraea	JQ660970	soil	Freshwater sediments,mats and soil
Eudoraea	JQ580369	sediments from Rodas Beach polluted with crude oil	Hydrocarbon polluted sediments and soil
Eudoraea	JQ580322	sediments from Rodas Beach polluted with crude oil	Hydrocarbon polluted sediments and soil
Eudoraea	JQ580246	sediments from Rodas Beach polluted with crude oil	Hydrocarbon polluted sediments and soil
Eudoraea	JQ580232	sediments from Rodas Beach polluted with crude oil	Hydrocarbon polluted sediments and soil
Eudoraea	JQ580224	sediments from Rodas Beach polluted with crude oil	Hydrocarbon polluted sediments and soil
Eudoraea	JQ580193	sediments from Rodas Beach polluted with crude oil	Hydrocarbon polluted sediments and soil
Eudoraea	JQ580161	sediments from Rodas Beach polluted with crude oil	Hydrocarbon polluted sediments and soil
Eudoraea	JQ579982	sediments from Figueiras Beach	Marine sediments
Zeaxanthinibacter	AB264057	seawater	seawater
Zeaxanthinibacter	AM259875	sponge cortex	Marine animal
Zeaxanthinibacter	AM934860	pilot-scale bioremediation process of a hydrocarbon-contaminated soil	Hydrocarbon polluted sediments and soil
Zeaxanthinibacter	AM934989	pilot-scale bioremediation process of a hydrocarbon-contaminated soil	Hydrocarbon polluted sediments and soil
Zeaxanthinibacter	AM935340	pilot-scale bioremediation process of a hydrocarbon-contaminated soil	Hydrocarbon polluted sediments and soil
Zeaxanthinibacter	AY372917	marine sponge Pseudoceratina clavata	Marine animal
Zeaxanthinibacter	DQ334612	heavy metal polluted marine sediment	Marine sediments
Zeaxanthinibacter	DQ334618	heavy metal polluted marine sediment	Marine sediments
Zeaxanthinibacter	DQ334666	pristine marine sediment	Marine sediments
Zeaxanthinibacter	EF157215	heavy oil seeps of the Rancho La Brea tar pits	Wastewater
Zeaxanthinibacter	EF208678	sandy carbonate sediment	Marine animal
Zeaxanthinibacter	FM209090	pilot-scale bioremediation process of a hydrocarbon-contaminated soil	Freshwater sedimnets,mats and soil
Zeaxanthinibacter	HQ190475	Zhongyuan oil field	Freshwater sedimnets,mats and soil
Zeaxanthinibacter	HQ326324	biofilm on SWRO membranes	Freshwater sedimnets,mats and soil
Zeaxanthinibacter	HQ697712	hydrocarbon contaminated saline-alkali soil	hydrocarbon polluted sediments and soil
Zeaxanthinibacter	HQ697774	hydrocarbon contaminated saline-alkali soil	hydrocarbon polluted sediments and soil
Zeaxanthinibacter	HQ864187	soil samples from permafrost along the Shule River in the Tibetan Pleteau	Freshwater sedimnets,mats and soil
Zeaxanthinibacter	JF344335	hydrocarbon polluted marine sediments from figueiras beach	hydrocarbon polluted sediments and soil
Zeaxanthinibacter	JF421167	petroleum-contaminated saline-alkali soil with phytoremediation	hydrocarbon polluted sediments and soil
Zeaxanthinibacter	JN038261	petroleum-contaminated soil	hydrocarbon polluted sediments and soil
Zeaxanthinibacter	JN530872	Guerrero Negro Hypersaline Mat 10; altitude 310m AMSL; sample depth 1m below water level, 34-49mm depth into the mat	Salinewater sedimnets,mats and soil
Zeaxanthinibacter	JN531926	Guerrero Negro Hypersaline Mat 10; altitude 310m AMSL; sample depth 1m below water level, 34-49mm depth into the mat	Salinewater sedimnets,mats and soil
Zeaxanthinibacter	JN532772	Guerrero Negro Hypersaline Mat 10; altitude 310m AMSL; sample depth 1m below water level, 34-49mm depth into the mat	Salinewater sedimnets,mats and soil
Zeaxanthinibacter	DQ334612	heavy metal polluted marine sediment	Heavy metal polluted sediment
Zeaxanthinibacter	DQ334618	heavy metal polluted marine sediment	Heavy metal polluted sediment
Zeaxanthinibacter	DQ334666	pristine marine sediment	Marine sediments
Zeaxanthinibacter	EF123627	black band diseased (BBD) coral tissues	Marine animal
Zeaxanthinibacter	EF137891	marine sandy sediment with deposition of metal-polluted silt	Heavy metal polluted sediment
Zeaxanthinibacter	EF157215	heavy oil seeps of the Rancho La Brea tar pits	hydrocarbon polluted sediments and soil
Zeaxanthinibacter	EF208678	sandy carbonate sediment	Marine sediments
Zeaxanthinibacter	EF545745	soil	Freshwater sedimnets,mats and soil
Zeaxanthinibacter	EF545747	soil	Freshwater sedimnets,mats and soil
Zeaxanthinibacter	EF545748	soil	Freshwater sedimnets,mats and soil
Zeaxanthinibacter	EU019361	black band diseased (BBD) coral tissues of Diploria clivosa; genomic DNA was extracted from frozen BBD samples	Marine animal
Zeaxanthinibacter	EU140522	intertidal flat	Marine sediments
Zeaxanthinibacter	EU375150	total DNA extracted from hydrocarbon polluted sand by the Prestige oil spill	hydrocarbon polluted sediments and soil
Zeaxanthinibacter	FJ156476	mucus from diseased coral colony	Marine animal
Zeaxanthinibacter	FJ912081	stromatolite (marine microbial mat)	Marine microbial mat
Zeaxanthinibacter	FM209090	pilot-scale bioremediation process of a hydrocarbon-contaminated soil	Hydrocarbon polluted sediments and soil
Zeaxanthinibacter	GQ412799	marine sediments from Reference site at time point 0	Marine sediments
Zeaxanthinibacter	GQ413470	coral-associated bacterial community colony 10 from Near-1 site at time point 22 days	Marine animal
Zeaxanthinibacter	GU174672	heat-stressed juvenile Acropora tenuis coral	Marine animal
Zeaxanthinibacter	HM178711	sediment	Freshwater sedimnets,mats and soil
Zeaxanthinibacter	HM178723	sediment	Freshwater sedimnets,mats and soil
Zeaxanthinibacter	HM178734	sediment	Freshwater sedimnets,mats and soil
Zeaxanthinibacter	HM178768	sediment	Freshwater sedimnets,mats and soil
Zeaxanthinibacter	HM178817	sediment	Freshwater sedimnets,mats and soil
Zeaxanthinibacter	HM178863	sediment	Freshwater sedimnets,mats and soil
Zeaxanthinibacter	HM178875	sediment	Freshwater sedimnets,mats and soil
Zeaxanthinibacter	HQ190475	Zhongyuan oil field	Freshwater sedimnets,mats and soil
Zeaxanthinibacter	HQ326324	biofilm on SWRO membranes	Freshwater sedimnets,mats and soil
Zeaxanthinibacter	HQ601727	biofilm, glass, aquaria experiment pH 8.12, temp 23C	Freshwater sedimnets,mats and soil
Zeaxanthinibacter	HQ601803	biofilm, glass, aquaria experiment pH 7.85, temp 23C	Freshwater sedimnets,mats and soil
Zeaxanthinibacter	HQ697712	hydrocarbon contaminated saline-alkali soil	Hydrocarbon polluted sediments and soil
Zeaxanthinibacter	HQ697774	hydrocarbon contaminated saline-alkali soil	Hydrocarbon polluted sediments and soil
Zeaxanthinibacter	HQ864187	soil samples from permafrost along the Shule River in the Tibetan Pleteau	Freshwater sedimnets,mats and soil
Zeaxanthinibacter	JF261873	biofilm glass	Freshwater sedimnets,mats and soil
Zeaxanthinibacter	JF261906	biofilm glass	Freshwater sedimnets,mats and soil
Zeaxanthinibacter	JF344335	hydrocarbon polluted marine sediments from figueiras beach	Hydrocarbon polluted sediments and soil
Zeaxanthinibacter	JF389168	1.714-1.722 g/ml fraction of 15N-monoammonium phosphate treated uncontaminated high Arctic soil	Hydrocarbon polluted sediments and soil
Zeaxanthinibacter	JF392124	1.707-1.714 g/ml fraction of 15N-monoammonium phosphate treated uncontaminated high Arctic soil	Hydrocarbon polluted sediments and soil
Zeaxanthinibacter	JF421167	petroleum-contaminated saline-alkali soil with phytoremediation	Hydrocarbon polluted sediments and soil
Zeaxanthinibacter	JF789265	marine sediment	Marine sediments
Zeaxanthinibacter	JF789302	marine sediment	Marine sediments
Zeaxanthinibacter	JN038261	petroleum-contaminated soil	Hydrocarbon polluted sediments and soil
Zeaxanthinibacter	JN530872	Guerrero Negro Hypersaline Mat 10; altitude 310m AMSL; sample depth 1m below water level, 34-49mm depth into the mat	Salinewater sedimnets,mats and soil
Zeaxanthinibacter	JN531926	Guerrero Negro Hypersaline Mat 10; altitude 310m AMSL; sample depth 1m below water level, 34-49mm depth into the mat	Salinewater sedimnets,mats and soil
Robiginitalea	AB241009	benthic infaunal burrow wall of Niida River	Freshwater sedimnets,mats and soil
Robiginitalea	AB780175	sediment of Lake Jusan	Freshwater sedimnets,mats and soil
Robiginitalea	AJ786633	commercial nitrifying inoculum	Freshwater sedimnets,mats and soil
Robiginitalea	AM501816	Lagoon sediment	Freshwater sedimnets,mats and soil
Robiginitalea	AM501832	Lagoon sediment	Freshwater sedimnets,mats and soil
Robiginitalea	AM501861	Lagoon sediment	Freshwater sedimnets,mats and soil
Robiginitalea	AY345434	Lake Kauhako, water	Freshwater
Robiginitalea	AY500043	marine sediment	marine sediments
Robiginitalea	AY604972	sediment	marine sediments
Robiginitalea	AY710783	lon=81.2797W, lat=31.3884N; sediment 0-1cm collected on Feb 01, 2002, Sapelo Island Microbial Observatory Dean Creek Marsh sampling site	Freshwater sedimnets,mats and soil
Robiginitalea	AY711298	lon=81.2797W, lat=31.3884N; sediment 0-1cm collected on Feb 01, 2003, Sapelo Island Microbial Observatory Dean Creek Marsh sampling site	Freshwater sedimnets,mats and soil
Robiginitalea	AY711798	lon=81.2797W, lat=31.3884N; sediment 14-16cm collected on Aug 01, 2002, Sapelo Island Microbial Observatory Dean Creek Marsh sampling site	Freshwater sedimnets,mats and soil
Robiginitalea	AY712194	lon=81.2699W, lat=31.3929N; surface water collected on Jan 26, 2001, Sapelo Island Microbial Observatory Dean Creek Marsh sampling site	Freshwater
Robiginitalea	AY712213	lon=81.2699W, lat=31.3929N; surface water collected on Jan 26, 2002, Sapelo Island Microbial Observatory Dean Creek Marsh sampling site	Freshwater
Robiginitalea	CP001712	marine sediment	marine sediments
Robiginitalea	DQ256603	calcareous sediment	marine sediments
Robiginitalea	DQ330360	hypersaline microbial mat: Guerrero Negro	Salinewater sedimnets,mats and soil
Robiginitalea	DQ330366	hypersaline microbial mat: Guerrero Negro	Salinewater sedimnets,mats and soil
Robiginitalea	DQ330375	hypersaline microbial mat: Guerrero Negro	Salinewater sedimnets,mats and soil
Robiginitalea	DQ330376	hypersaline microbial mat: Guerrero Negro	Salinewater sedimnets,mats and soil
Robiginitalea	DQ330378	hypersaline microbial mat: Guerrero Negro	Salinewater sedimnets,mats and soil
Robiginitalea	DQ330384	hypersaline microbial mat: Guerrero Negro	Salinewater sedimnets,mats and soil
Robiginitalea	DQ330386	hypersaline microbial mat: Guerrero Negro	Salinewater sedimnets,mats and soil
Robiginitalea	DQ330387	hypersaline microbial mat: Guerrero Negro	Salinewater sedimnets,mats and soil
Robiginitalea	DQ330391	hypersaline microbial mat: Guerrero Negro	Salinewater sedimnets,mats and soil
Robiginitalea	KY780360	sediment	marine sediments
Robiginitalea	AM501816	Trichodesmium erythraeum colonies	marine animals
Robiginitalea	AM501832	gut	marine animals
Robiginitalea	AM501861	gut from red palm weevil in November	marine animals
Robiginitalea	AY345434	gut	marine animals
Robiginitalea	AY500043	gut	marine animals
Robiginitalea	AY604972	gut from red palm weevil in November	marine animals
Robiginitalea	AY710783	gut from red palm weevil in November	marine animals
Robiginitalea	AY711298	gut	marine animals
Robiginitalea	AY711798	gut	marine animals
Robiginitalea	AY712194	gut from red palm weevil in November	marine animals
Robiginitalea	AY712213	gut	marine animals
Robiginitalea	CP001713	gut	marine animals
Robiginitalea	DQ256603	gut	marine animals
Robiginitalea	DQ330360	gut	marine animals
Robiginitalea	DQ330366	gut from red palm weevil in November	marine animals
Robiginitalea	DQ330375	sea soil	Salinewater sedimnets,mats and soil
Robiginitalea	DQ330376	host hemolymph	marine animals
Robiginitalea	DQ330378	host hemolymph	marine animals
Robiginitalea	DQ330384	Lagoon sediment	Freshwater sedimnets,mats and soil
Robiginitalea	DQ330386	Cystoseira compressa	marine animals
Robiginitalea	DQ330387	Cystoseira compressa	marine animals
Robiginitalea	DQ330391	Cystoseira compressa	Marine animals
Robiginitalea	KY780361	Crude oil polluted soil	Hydrocarbon polluted sediments and soil
Robiginitalea	AM501816	Sediment at 50m from Karankadu Coastal	Marine sediments
Robiginitalea	AM501832	Gut microbiota of Seriola rivoliana	Marine animals
Robiginitalea	AM501861	biofilm	Freshwater sedimnets,mats and soil
Robiginitalea	AY345434	water sample	Freshwater
Robiginitalea	AY500043	biofilm	Freshwater sedimnets,mats and soil
Robiginitalea	AY604972	Cytoseira compressa and surrounding	Freshwater sedimnets,mats and soil
Robiginitalea	AY710783	Near shore sediment from Karankadu	Marine sediments
Robiginitalea	AY711298	Gut microbiota of Seriola rivoliana	Marine animals
Robiginitalea	AY711798	biofilm	Freshwater sedimnets,mats and soil
Robiginitalea	AY712194	sediments	Marine sediments
Robiginitalea	AY712213	Todos os Santos Bay oil-contaminated	Hydrocarbon polluted sediments and soil
Robiginitalea	CP001714	Litopenaeus vannamei. gut	Marine animals
Robiginitalea	DQ256603	sediments	Marine sediments
Robiginitalea	DQ431891	Gulf of Mexico sediment	Marine sediments
Robiginitalea	DQ607179	sediment	Marine sediments
Robiginitalea	JQ579924	sediments from Figueiras Beach	Marine sediments
Robiginitalea	JQ579910	sediments from Figueiras Beach	Marine sediments
Robiginitalea	JQ579870	sediments from Figueiras Beach	Marine sediments
Robiginitalea	JQ579855	sediments from Figueiras Beach	Marine sediments
Robiginitalea	JQ579823	sediments from Figueiras Beach	Marine sediments
Robiginitalea	JQ579789	sediments from Figueiras Beach	Marine sediments
Robiginitalea	JQ579737	sediments from Figueiras Beach	Marine sediments
Robiginitalea	JQ579722	sediments from Figueiras Beach	Marine sediments
Robiginitalea	JQ579673	sediments from Figueiras Beach	Marine sediments
Robiginitalea	JF811910	ark clam	Marine animal
Robiginitalea	JF344026	hydrocarbon polluted marine sediments from rodas beach	Hydrocarbon polluted sediments and soil
Robiginitalea	GQ249554	marine sediment: 12-14 cm layer	Marine sediments
Robiginitalea	FJ545547	North Yellow Sea sediment	Marine sediments
Robiginitalea	EU652655	Yellow Sea sediment	Marine sediments
Robiginitalea	EU287304	arctic surface sediment	Marine sediments
Robiginitalea	DQ334656	pristine marine sediment	Marine sediments
Robiginitalea	AM040137	sandy sediments	Marine sediments
Robiginitalea	JX854265	Macroalgae	Marine plants
Robiginitalea	JX854266	Macroalgae	Marine plants
Robiginitalea	JX854267	Macroalgae	Marine plants
Robiginitalea	JX854217	Macroalgae	Marine plants
Robiginitalea	JX854216	Macroalgae	Marine plants
Robiginitalea	JX854215	Macroalgae	Marine plants
Robiginitalea	JX854214	Macroalgae	Marine plants
Robiginitalea	JX854213	Macroalgae	Marine plants
Robiginitalea	JX854212	Macroalgae	Marine plants
Robiginitalea	JX854211	Surface of the red alga Vertebrata	Marine plants
Robiginitalea	JX854210	Macroalgae	Marine plants
Robiginitalea	JX854209	Macroalgae	Marine plants
Robiginitalea	JX854208	sea	Sea water
Robiginitalea	JX854207	Macroalgae	Marine plants
Robiginitalea	JX854206	Macroalgae	Marine plants
Robiginitalea	JX854205	Macroalgae	Marine plants
Robiginitalea	JX854204	Macroalgae	Marine plants
Robiginitalea	JX854203	Polychaete specimens	Marine animals
Robiginitalea	JX854202	coastal waters	Sea water
Robiginitalea	JX854201	coastal seawater	Sea water
Robiginitalea	JX854200	coastal waters	Sea water
Robiginitalea	JX85418	coastal waters	Sea water
Robiginitalea	JX854217	Macrocystis (giant kelp) macroalgae	Marine plants
Robiginitalea	JX854216	sea sediment	Marine sediments
Robiginitalea	JX854215	sea sediment	Marine sediments
Robiginitalea	JX854214	Palmaria (red ribbon) macroalgae	Marine plants
Robiginitalea	JX854213	sea water	Sea water
Robiginitalea	JX854212	sea sediment	Marine sediments
Robiginitalea	JX854211	seawater	Sea water
Robiginitalea	JX854210	coastal waters	Sea water
Robiginitalea	JX854209	seawater	Sea water
Robiginitalea	JX454529	marine	Sea water
Robiginitalea	JX298552	Marine	Sea water
Robiginitalea	JX298551	marine diatom	Marine plants
Robiginitalea	JX298550	sea	Sea water
Robiginitalea	JX298549	coastal alga	Marine plants
Robiginitalea	JX298548	sea	Sea water
Robiginitalea	AB032509	surface seawater	Sea water
Robiginitalea	AB032510	surface seawater	Sea water
Robiginitalea	AB032511	surface seawater	Sea water
Robiginitalea	AB032512	surface seawater	Sea water
Robiginitalea	AB032513	surface seawater	Sea water
Robiginitalea	AB100840	surface seawater	Sea water
Robiginitalea	AB100841	surface seawater	Sea water
Robiginitalea	AB100842	surface seawater	Sea water
Robiginitalea	AB166891	surface seawater	Sea water
Robiginitalea	AB180390	surface seawater	Sea water
Robiginitalea	AB517706	surface seawater	Sea water
Robiginitalea	AB681016	surface seawater	Sea water
Robiginitalea	AB681017	surface seawater	Sea water
Robiginitalea	AB681032	surface seawater	Sea water
Robiginitalea	AB681033	surface seawater	Sea water
Robiginitalea	AB681034	surface seawater	Sea water
Robiginitalea	AB681335	surface seawater	Sea water
Robiginitalea	AB681342	surface seawater	Sea water
Muriicola	AB853506	seawater	Sea water
Muriicola	AJ880449	Tidal flat sediment, depth: 0 cm	Marine sediments
Muriicola	AM118005	tidal sediment slurry	Marine sediments
Muriicola	AY171354	marine sediment	Marine sediments
Muriicola	AY171363	marine sediment	Marine sediments
Muriicola	DQ334636	Heavy metal polluted marine sediment	Heavy metal polluted sediments and soil
Muriicola	DQ334637	surface of Island	Salinewater sedimnets,mats and soil
Muriicola	DQ334638	seawater from the Mariana Trench	Sea water
Muriicola	DQ334639	seawater	Sea water
Muriicola	DQ334640	soil	Freshwater sedimnets,mats and soil
Muriicola	DQ334641	permafrost sediments at depths 17-20 meters Salinity	Salinewater sedimnets,mats and soil
Muriicola	DQ334642	Cystoseira compressa	Marine animals
Muriicola	DQ334643	Cystoseira compressa	Marine animals
Muriicola	DQ334644	soil	Freshwater sedimnets,mats and soil
Muriicola	DQ334645	soil	Freshwater sedimnets,mats and soil
Muriicola	DQ334646	marine sediment	Marine sediments
Muriicola	DQ334647	Beach sand	Marine sediments
Muriicola	DQ334648	Beach sand	Marine sediments
Muriicola	DQ334649	water brine, permafrost	Salinewater sedimnets,mats and soil
Muriicola	DQ334650	sea water	Sea water
Muriicola	DQ334660	pristine marine sediment	Marine sediments
Muriicola	EF028971	Zostera marina oxidized sediment horizon	Marine sediments
Muriicola	EU443206	seawater	Sea water
Muriicola	FJ545436	North Yellow Sea sediment	Marine sediments
Muriicola	FJ545444	North Yellow Sea sediment	Marine sediments
Cellulophaga	AB032509	Marine Biofilm	Salinewater sedimnets,mats and soil
Cellulophaga	AB032510	seawater	Sea water
Cellulophaga	AB032511	tidal flat	Marine sediments
Cellulophaga	AB032512	seawate	Sea water
Cellulophaga	AB032513	Yellow Sea seawater	Sea water
Cellulophaga	AB100840	seaweed surface	Maine plants
Cellulophaga	AB100841	seawater	Sea water
Cellulophaga	AB100842	Yellow Sea	Sea water
Cellulophaga	AB166891	China: Qingda	Sea water
Cellulophaga	AB180390	Lianyungang sea area	Sea water
Cellulophaga	AB517706	seaweed surface	Maine plants
Cellulophaga	AB681016	seaweed surface	Maine plants
Cellulophaga	AB681017	seaweed surface	Maine plants
Cellulophaga	AB681032	seaweed surface	Maine plants
Cellulophaga	AB681033	marine sand	Marine sediments
Cellulophaga	AB681034	seawater	Sea water
Cellulophaga	AB681335	soil from carrageenan producing statio	Freshwater sedimnets,mats and soil
Cellulophaga	AB681342	surface of Fucus serratus	Marine animals
Cellulophaga	AB681444	surface of red algae	Marine plants
Cellulophaga	AB681468	Lianyungang sea are	Sea water
Cellulophaga	AF001366	surface of red algae	Maine plants
Cellulophaga	AF025315	surface of red algae	Maine plants
Cellulophaga	AF235118	seawater	Sea water
Cellulophaga	AF366000	surfaces of algal species from Antarctic	Maine plants
Cellulophaga	AF367856	marine sediment	Marine sediments
Cellulophaga	AF493679	seawater	Sea water
Cellulophaga	AF493680	marine	Sea water
Cellulophaga	AF493681	surface seawater	Sea water
Cellulophaga	AF497997	surface seawater	Sea water
Cellulophaga	AF539753	sea water	Sea water
Cellulophaga	AF539754	seawater	Sea water
Cellulophaga	AJ005972	sea water	Sea water
Cellulophaga	AJ005973	seawater, particle-fraction	Sea water
Cellulophaga	AJ936938	beach mud	Marine sediments
Cellulophaga	AM180735	beach	Marine sediments
Cellulophaga	AM913909	Surface seawater	Sea water
Cellulophaga	ARZX01000052	surface seawater	Sea water
Cellulophaga	ATLH01000031	surface seawater	Sea water
Cellulophaga	AY035870	vermetid reef	Marine sediments
Cellulophaga	AY515448	Marine water	Marine water
Cellulophaga	AY515449	sediment	Marine sediments
Cellulophaga	AY536578	sediment	Marine sediments
Cellulophaga	AY651815	algae	Marine plants
Cellulophaga	AY699366	sediment	Marine sediments
Cellulophaga	AY771718	Coastal marine surface water	Sea water
Cellulophaga	AY937008	Coastal marine surface wate	Sea water
Cellulophaga	AY950182	North Sea Sponge	Marine animals
Cellulophaga	CP002453	Marine	Sea water
Cellulophaga	PHUL01000001	Marine water	Sea water
Cellulophaga	OBRS01570530	seawater	Sea water
Cellulophaga	MK143219	sea water of East Sea of China	Sea water
Cellulophaga	MK143217	intestinal mucus of olive flounder	Marine animals
Cellulophaga	MK143213	marine sediment	Marine sediments
Cellulophaga	MK143211	biofilm surrounding a gastropod	Marine animals
Cellulophaga	MG681179	North Sea Water culture experiment	Marine animals
Cellulophaga	MG456902	North Sea Water culture experiment	Marine animals
Cellulophaga	MG456766	North Sea Water culture experiment	Marine animals
Cellulophaga	MF522828	North Sea Water culture experiment	Marine animals
Cellulophaga	MF443718	Agua do mar	Sea water
Cellulophaga	MF443606	North Sea Water culture experiment	Marine animals
Cellulophaga		branches	Marine plants
Cellulophaga	LY488577	seawater	Sea water
Cellulophaga	LT724228	marine sediment	Marine sediments
Cellulophaga	LT173145	vent surface water	Sea water
Cellulophaga	LT172501	sea water	Sea water
Cellulophaga	LN909407	sea water	Sea water
Cellulophaga	LN909401	North Sea Water culture experiment	Marine animals
Cellulophaga	LN909311	North Sea Water culture experiment	Marine animals
Cellulophaga	LN909286	North Sea Water culture experiment	Marine animals
Cellulophaga	LN909284	North Sea Water culture experiment	Marine animals
Cellulophaga	LN909282	North Sea Water culture experiment	Marine animals
Cellulophaga	LN909280	gill	Marine animals
Cellulophaga	LN909278	marine sponge	Marine animals
Cellulophaga	LN909276	marine sponge	Marine animals
Cellulophaga	LN909274	Polychaete specimens	Marine animals
Cellulophaga	LN909273	Sylt List	Marine sediments
Cellulophaga	LN909271	Sylt List	Marine sediments
Cellulophaga	LN909270	Sylt List	Marine sediments
Cellulophaga	LN909262	Sylt List	Marine sediments
Cellulophaga	LN909263	Sylt List	Marine sediments
Cellulophaga	LN909264	Sylt List	Marine sediments
Cellulophaga	LN881404	Sylt List	Marine sediments
Cellulophaga	LN881403	Sylt List	Marine sediments
Cellulophaga	LN881402	Helgoland Kabeltonne	Sea water
Cellulophaga	LN881401	Sylt List	Marine sediments
Cellulophaga	LN881400	Sylt List	Marine sediments
Cellulophaga	LN881399	Sylt, Koenigshafen	Marine sediments
Cellulophaga	LN881398	seawater, Ulleung Island	Sea water
Cellulophaga	LN881397	marine sponge	Marine animals
Cellulophaga	LN881396	marine sponge	Marine animals
Cellulophaga	LN881395	marine sponge	Marine animals
Cellulophaga	LN881394	marine sponge	Marine animals
Cellulophaga	LN881393	Polychaete specimens	Marine animals
Cellulophaga	LN881392	Sylt List	Marine sediments
Cellulophaga	LN881391	Sylt List	Marine sediments
Cellulophaga	LN881390	Sylt List	Marine sediments
Cellulophaga	LN881389	Sylt List	Marine sediments
Cellulophaga	LN881388	Sylt List	Marine sediments
Cellulophaga	LN881387	Sylt List	Marine sediments
Cellulophaga	LN881386	Sylt List	Marine sediments
Cellulophaga	LN881385	Sylt, Koenigshafen	Marine sediments
Cellulophaga	LN881384	Sylt List	Marine sediments
Cellulophaga	LN881383	Sylt List	Marine sediments
Cellulophaga	LN881382	Sylt List	Marine sediments
Cellulophaga	LN881381	Sylt List	Marine sediments
Cellulophaga	LN881380	Sylt List	Marine sediments
Cellulophaga	LN881379	Sylt List	Marine sediments
Cellulophaga	KX685657	Sylt List	Marine sediments
Cellulophaga	KX453243	Sylt List	Marine sediments
Cellulophaga	KU896968	Sylt List	Marine sediments
Cellulophaga	KU896967	Sylt List	Marine sediments
Cellulophaga	KU896966	Sylt List	Marine sediments
Cellulophaga	KU896965	Sylt List	Marine sediments
Cellulophaga	KU896964	Sylt List	Marine sediments
Cellulophaga	KU896963	Sylt, Hausstrand	Marine sediments
Cellulophaga	KU896962	Sylt, Hausstrand	Marine sediments
Cellulophaga	KU896960	seawater	Sea water
Cellulophaga	KU896959	marine sponge	Marine animals
Cellulophaga	KU896958	Raspailia ramosa	Marine sediments
Cellulophaga	KU896957	Stelligera stuposa
Cellulophaga	KU691893	marine sponge	Marine animals
Cellulophaga	KU691352	Stelligera stuposa
Cellulophaga	KU690183	marine sponge	Marine animals
Cellulophaga	KU635079	marine sponge	Marine animals
Cellulophaga	KU635080	Polychaete specimens	Marine animals
Cellulophaga	KU635081	Sylt, Koenigshafen	Marine sediments
Cellulophaga	KU635082	Delesseria sanguine
Cellulophaga	KU635083	seawater	Sea water
Cellulophaga	KU625352	seawater	Sea water
Cellulophaga	KU625353	rocky shore biofilm	Salinewater sedimnets,mats and soil
Cellulophaga	KU625354	Raspailia ramosa
Cellulophaga	KU625355	marine sponge	Marine animals
Cellulophaga	KU625356	marine sponge	Marine animals
Cellulophaga	KU517708	Sylt List	Marine sediments
Cellulophaga	KU517709	Sylt List	Marine sediments
Cellulophaga	KU517710	Janssand
Cellulophaga	KU517711	biofilm surrounding the gastropod	Marine animals
Cellulophaga	KT354516	Sylt List	Marine sediments
Cellulophaga	KR054260	Sylt List	Marine sediments
Cellulophaga	KR054251	Sylt List	Marine sediments
Cellulophaga	KP681361	Sylt List	Marine sediments
Cellulophaga	KM613158	Sylt List	Marine sediments
Cellulophaga	KM500193	Sylt List	Marine sediments
Cellulophaga	KM499978	Sylt List	Marine sediments
Cellulophaga	KM400676	Sylt List	Marine sediments
Cellulophaga	KM400654	Sylt List	Marine sediments
Cellulophaga	KM400635	Sylt List	Marine sediments
Cellulophaga	KJ858520	Sylt, Hausstrand	Marine sediments
Cellulophaga	KF270635	Sylt, Hausstrand	Marine sediments
Cellulophaga	KF270634	Sylt, Koenigshafen	Marine sediments
Cellulophaga	KF270633	Sylt, West Beach	Marine sediments
Cellulophaga	KF270632	Fucus vesiculosus	Marine animals
Cellulophaga	KF270631	Delesseria sanguinea	Marine animals
Cellulophaga	KF270630	marine sponge	Marine animals
Cellulophaga	KF193901	marine	Sea water
Cellulophaga	KF032929	marine	Sea water
Cellulophaga	KF032928	Marine	Sea water
Cellulophaga	KF032927	marine	Sea water
Cellulophaga	KF032925	coastal seawater	Sea water
Cellulophaga	KF009883	coastal seawater	Sea water
Cellulophaga	KC592372	Delesseria sanguinea	marine sediments
Cellulophaga	KC592366	Fucus vesiculosus	Marine animals
Cellulophaga	KC543442	Delesseria sanguinea	Marine animals
Cellulophaga	KC534369	Fucus vesiculosus	Marine animals
Cellulophaga	KC493244	Delesseria sanguinea	Marine animals
Cellulophaga	KC012908	gill	Marine animals
Cellulophaga	KC012899	Fucus vesiculosus	Marine animals
Cellulophaga	JX948667	viscera of the Gastropod	Marine animals
Cellulophaga	JX874164	thallus	Marine animals
Cellulophaga	JX854346	Raspailia ramosa
Cellulophaga	JX854311	marine sponge	Marine animals
Cellulophaga	JX854312	marine sponge	Marine animals
Cellulophaga	JX854313	marine	Marine water
Cellulophaga	JX854314	gill	Marine animals
Cellulophaga	JX854264	marine sponge	Marine animals
Cellulophaga	LN881398	soil	Freshwater sedimnets,mats and soil
Maribacter	AB180387	ocean	Sea water
Maribacter	AB365064	seawater	Sea water
Maribacter	AB526333	seawater	Sea water
Maribacter	AB712337	seawater	Sea water
Maribacter	AF235126	seawater	Sea water
Maribacter	AF359541	seamount near Yap Trench	Marine sediments
Maribacter	AF367849	sea sediment soil	Marine sediments
Maribacter	AF468227	sediment	Marine sediments
Maribacter	AF468244	sea water	Sea water
Maribacter	AF468265	marine sediment	Marine sediments
Maribacter	AF468408	seaweed and seawater	Marine plants
Maribacter	AF468420	sea sand	Marine sediments
Maribacter	AF468428	tidal flat sediment	Marine sediments
Maribacter	AF493682	sea sediment soil	Marine sediments
Maribacter	AB180387	seashore sand	Marine sediments
Maribacter	AB365064	water collected from the junction_x000D_ solation_source=Seaweed"	Marine plants
Maribacter	AB526333	tidal flat sediment	Marine sediments
Maribacter	AB712337	Water around brown algae	Marine plants
Maribacter	AF235126	Coastal marine surface water	Sea water
Maribacter	AF359541	Coastal marine surface water	Sea water
Maribacter	AF367849	Coastal marine surface water	Sea water
Maribacter	AF468227	Kongsfjorden water	Sea water
Maribacter	AF468244	Kongsfjorden water	Sea water
Maribacter	AF468265	Biofilm bacteria isolated from common	Salinewater sedimnets,mats and soil
Maribacter	AF468408	lagoon	Saline water
Maribacter	AF468420	soil	Freshwater sedimnets,mats and soil
Maribacter	AF468428	soil	Freshwater sedimnets,mats and soil
Maribacter	AF493682	marine sediment	Marine sediments
Maribacter	AB180387	marine sediment	Marine sediments
Maribacter	AB365064	soil	Freshwater sedimnets,mats and soil
Maribacter	AB526333	soil	Freshwater sedimnets,mats and soil
Maribacter	AB712337	marine sponge	Marine animals
Maribacter	AF235126	marine sponge	Marine animals
Maribacter	AF359541	marine sponge	Marine animals
Maribacter	AF367849	soil	Freshwater sedimnets,mats and soil
Maribacter	AF468227	shallow-sea hydrothermal system in	Sea water
Maribacter	AF468244	marine sediment	Marine sediments
Maribacter	AF468265	Artificial Seawater 30 PSU	Sea water
Maribacter	AF468408	Southern ocean (subantarctic zone)	Sea water
Maribacter	AF468420	bottom sediments	Marine sediments
Maribacter	AF468428	sediment	Marine sediments
Maribacter	AF493682	clonal culture of a microalgae	Marine plants
Maribacter	AB180387	carapace	Marine animals
Maribacter	AB365064	seawater, particle-fraction	Sea water
Maribacter	AB526333	marine sediment	Marine sediments
Maribacter	AB712337	bottom sediments	Marine sediments
Maribacter	AF235126	bottom sediments	Marine sediments
Maribacter	AF359541	tundra soil	Freshwater sedimnets,mats and soil
Maribacter	AF367849	tundra soil	Freshwater sedimnets,mats and soil
Maribacter	AF468227	marine sediment	Marine sediments
Maribacter	AF468244	clonal culture of a microalgae	Marine plants
Maribacter	AF468265	IMTA
Maribacter	AF468408	sea water from Praia de Angeiras	Sea water
Maribacter	AF468420	sea	Sea water
Maribacter	AF468428	A. aurita medusa Baltic Sea husbandry	Marine animals
Maribacter	AF493682	carapace	Marine animals
Maribacter	AB180387	seawater	Sea water
Maribacter	AB365064	vent sediment	Marine sediments
Maribacter	AB526333	intertidal sand biofilm	Salinewater sedimnets,mats and soil
Maribacter	AB712337	vent surface water	Fresh water
Maribacter	AF235126	soil	Freshwater sedimnets,mats and soil
Maribacter	AF359541	vent surface water	Fresh water
Maribacter	AF367849	soil	Freshwater sedimnets,mats and soil
Maribacter	AF468227	bottom sediments	Marine sediments
Maribacter	AF468244	sediment	Marine sediments
Maribacter	AF468265	non-vent surface water	Sea water
Maribacter	AF468408	sea	Sea water
Maribacter	AF468420	seawater	Sea water
Maribacter	AF468428	marine sediment	Marine sediments
Maribacter	AF493682	Artificial Seawater 30 PSU	Sea water
Maribacter	AB180387	seawater	Sea water
Maribacter	AB365064	carapace	Marine animals
Maribacter	AB526333	vent surface water	Fresh water
Maribacter	AB712337	vent surface water	Fresh water
Maribacter	AF235126	Artificial Seawater 30 PSU	Sea water
Maribacter	AF359541	Algae	Marine plants
Maribacter	AF367849	seawater	Sea water
Maribacter	AF468227	seawater, particle-fraction	Sea water
Maribacter	AF468244	marine sediment	Marine sediments
Maribacter	AF468265	seawater	Sea water
Maribacter	AF468408	seawater	Sea water
Maribacter	AF468420	freshwater sediment	Freshwater sedimnets,mats and soil
Maribacter	AF468428	coastal ocean with bloom	Sea water
Maribacter	AF493682	marine sediments	Marine sediments
Maribacter	AB180387	Antarctic soil	Salinewater sedimnets,mats and soil
Maribacter	AB365064	marine sediments	Marine sediments
Maribacter	AB526333	marine	Sea water
Maribacter	AB712337	Ross Sea sediment	Marine sediments
Maribacter	AF235126	sea water from praia de angeiras	Sea water
Maribacter	AF359541	surface sediment from Alpha Ridge,	Freshwater sedimnets,mats and soil
Maribacter	AF367849	sponge	Marine animals
Maribacter	AF468227	Ross Sea sediment	Marine sediments
Maribacter	AF468244	lagoon sediment	Freshwater sedimnets,mats and soil
Maribacter	AF468265	algae	Marine plants
Maribacter	AF468408	Sedimnt	Marine sediments
Maribacter	AF468420	freshwater sediment	Freshwater sedimnets,mats and soil
Maribacter	AF468428	70m depth	Marine sediments
Maribacter	AF493682	rocky shore	Marine sediments
Maribacter	AB180387	Sylt List	Marine sediments
Maribacter	AB365064	Sylt List	Marine sediments
Maribacter	AB526333	Sylt List	Marine sediments
Maribacter	AB712337	Sylt List	Marine sediments
Maribacter	AF235126	Sylt List	Marine sediments
Maribacter	AF359541	Sylt List	Marine sediments
Maribacter	AF367849	Helgoland Kabeltonne	Sea water
Maribacter	AF468227	Helgoland Kabeltonne	Sea water
Maribacter	AF468244	Helgoland Kabeltonne	Sea water
Maribacter	AF468265	Sylt List	Marine sediments
Maribacter	AF468408	Sylt, Hausstrand	Marine sediments
Maribacter	AF468420	Sylt, Hausstrand	Marine sediments
Maribacter	AF468428	Sylt, Hausstrand	Marine sediments
Maribacter	AF493682	Sylt, Hausstrand	Marine sediments
Maribacter	AB180387	Sylt, Koenigshafen	Marine sediments
Maribacter	AB365064	Sylt, Koenigshafen	Marine sediments
Maribacter	AB526333	Sylt, Koenigshafen	Marine sediments
Maribacter	AB712337	Sylt, Koenigshafen	Marine sediments
Maribacter	AF235126	Coastal marine surface water	Sea water
Maribacter	AF359541	seawater	Sea water
Maribacter	AF367849	Polychaete specimens	Marine animals
Maribacter	AF468227	Sylt List	Marine sediments
Maribacter	AF468244	Sylt List	Marine sediments
Maribacter	AF468265	Sylt List	Marine sediments
Maribacter	AF468408	Helgoland Kabeltonne	Sea water
Maribacter	AF468420	Helgoland Kabeltonne	Sea water
Maribacter	AF468428	Sylt, Koenigshafen	Marine sediments
Maribacter	AF493682	seawater in Kongsfjorden, Spitsbergen	Sea water
Maribacter	AB180387	diatom cultures	Marine plants
Maribacter	AB365064	Sylt List	Marine sediments
Maribacter	AB526333	Sylt List	Marine sediments
Maribacter	AB712337	Helgoland Kabeltonne	Sea water
Maribacter	AF235126	Sylt List	Marine sediments
Maribacter	AF359541	Sylt List	Marine sediments
Maribacter	AF367849	Sylt, Hausstrand	Marine sediments
Maribacter	AF468227	Sylt, Hausstrand	Marine sediments
Maribacter	AF468244	Sylt, Koenigshafen	Marine sediments
Maribacter	AF468265	70m depth	Marine sediments
Maribacter	AF468408	sea water	Sea water
Maribacter	AF468420	sea water	Sea water
Maribacter	AF468428	Polychaete specimens	Marine animals
Maribacter	AF493682	Stelligera stuposa	Marine animals
Maribacter	AB180387	crude oil contaminated seawater	Hydrocarbon polluted sediments and soil
Maribacter	AB365064	coral mucus	Marine animals
Maribacter	AB526333	intertidal sand biofilm	Salinewater sedimnets,mats and soil
Maribacter	AB712337	Stelligera stuposa	Marine animals
Maribacter	AF235126	Helgoland Kabeltonne	Marine animals
Maribacter	AF359541	Sylt, Koenigshafen	Marine sediments
Maribacter	AF367849	Sylt, Koenigshafen	Marine sediments
Maribacter	AF468227	Coastal marine surface water	Sea water
Maribacter	AF468244	shallow-sea hydrothermal system
Maribacter	AF468265	crude oil contaminated seawater	Hydrocarbon polluted sediments and soil
Maribacter	AF468408	marine sponge while scuba diving at a solation_source=water 10m depth"	Marine animals
Maribacter	AF468420	Helgoland Kabeltonne	Sea water
Maribacter	AF468428	Helgoland Kabeltonne	Sea water
Maribacter	AF493682	Helgoland Kabeltonne	Sea water
Maribacter	AB180387	Helgoland Kabeltonne	Sea water
Maribacter	AB365064	Sylt, Koenigshafen	Marine sediments
Maribacter	AB526333	Sylt, Koenigshafen	Marine sediments
Maribacter	AB712337	Sylt, Koenigshafen	Marine sediments
Maribacter	AF235126	Antarctic sea sediment	Marine sediments
Maribacter	AF359541	crude oil contaminated seawater	Hydrocarbon polluted sediments and soil
Maribacter	AF367849	sea water	Sea water
Maribacter	AF468227	tidal flat	Marine sediments
Maribacter	AF468244	seawater in Kongsfjorden, Spitsbergen	Sea water
Maribacter	AF468265	Helgoland Kabeltonne	Sea water
Maribacter	AF468408	Sylt List	Marine sediments
Maribacter	AF468420	Janssand	Marine sediments
Maribacter	AF468428	Janssand	Marine sediments
Maribacter	AF493682	Janssand	Marine sediments
Maribacter	AB180387	Sylt, Hausstrand	Marine sediments
Maribacter	AB365064	Sylt, Koenigshafen	Marine sediments
Maribacter	AB526333	Sylt, Koenigshafen	Marine sediments
Maribacter	AB712337	Sylt, Koenigshafen	Marine sediments
Maribacter	AF235126	Gulf of Mexico methane seep mesocosms	Hydrocarbon polluted sediments and soil
Maribacter	AF359541	seawater, Ulleung Island	Sea water
Maribacter	AF367849	cell surface of environmental solation_source=Sylt List"	Marine sediments
Maribacter	AF468227	Helgoland Kabeltonne	Sea water
Maribacter	AF468244	Sylt List	Marine sediments
Maribacter	AF468265	Sylt, Hausstrand	Marine sediments
Maribacter	AF468408	Sylt, Koenigshafen	Marine sediments
Maribacter	AF468420	Sylt, Koenigshafen	Marine sediments
Maribacter	AF468428	Sylt, Koenigshafen	Marine sediments
Maribacter	AF493682	Harlesiel	Marine sediments
Maribacter	AB180387	Harlesiel	Marine sediments
Maribacter	AB365064	Fucus vesiculosus
Maribacter	AB526333	copepod fecal pellets from a microcosm solation_source=crude oil contaminated seawater"	Hydrocarbon polluted sediments and soil
Maribacter	AB712337	seawater in Kongsfjorden, Spitsbergen	Sea water
Maribacter	AF235126	seawater in Kongsfjorden, Spitsbergen	Sea water
Maribacter	AF359541	marine sponge	Marine animals
Maribacter	AF367849	clonal culture of coccolithophore	Marine plants
Maribacter	AF468227	marine sponge	Marine animals
Maribacter	AF468244	seawater	Sea water
Maribacter	AF468265	crude oil contaminated seawater	Hydrocarbon polluted sewater, sediments and soil
Maribacter	AF468408	crude oil contaminated seawater	Hydrocarbon polluted sewater, sediments and soil
Maribacter	AF468420	coral mucus	Marine animals
Maribacter	AF468428	seawater	Sea water
Maribacter	AF493682	surface seawater	Sea water
Maribacter	AB180387	surface seawater	Sea water
Maribacter	AB365064	surface seawater	Sea water
Maribacter	AB526333	surface seawater	Sea water
Maribacter	AB712337	surface seawater	Sea water
Maribacter	AF235126	surface seawater	Sea water
Maribacter	AF359541	Dinoflagellate	Marine animals
Maribacter	AF367849	Sea ice	Sea water
Maribacter	AF468227	deep-sea surface sediment	Marine sediments
Maribacter	AF468244	host hemolymph	Marine animals
Maribacter	AF468265	host hemolymph	Marine animals
Maribacter	AF468408	host hemolymph	Marine animals
Maribacter	AF468420	shell surface	Marine animals
Maribacter	AF468428	Lagoon sediment	Marine sediments
Maribacter	AF493682	host hemolymph	Marine animals
Maribacter	AB180387	host hemolymph	Marine animals
Maribacter	AB365064	host hemolymph	Marine animals
Maribacter	AB526333	host hemolymph	Marine animals
Maribacter	AB712337	host hemolymph	Marine animals
Maribacter	AF235126	host hemolymph	Marine animals
Maribacter	AF359541	host hemolymph	Marine animals
Maribacter	AF367849	host hemolymph	Marine animals
Maribacter	AF468227	Water from Abattoi	Sea water
Maribacter	AF468244	arthropod integument surfaces	Marine animals
Maribacter	AF468265	Cystoseira compressa	Marine animals
Maribacter	AF468408	sea water	Sea water
Maribacter	AF468420	seawater	Sea water
Maribacter	AF468428	seawater	Sea water
Maribacter	AF493682	Cystoseira compressa	Marine animals
Maribacter	AB180387	Cystoseira compressa	Marine animals
Maribacter	AB365064	seawater	Sea water
Maribacter	AB526333	500m depth water samples filtered on	Sea water
Maribacter	AB712337	seawater	Sea water
Maribacter	AF235126	500m depth water samples filtered on	Sea water
Maribacter	AF359541	500m depth water samples filtered on	Sea water
Maribacter	AF367849	500m depth water samples filtered on	Sea water
Maribacter	AF468227	Cystoseira compressa	Marine animals
Maribacter	AF468244	500m depth water samples filtered on	Sea water
Maribacter	AF468265	seawater	Sea water
Maribacter	AF468408	Cystoseira compressa	Marine animals
Maribacter	AF468420	Cystoseira compressa	Marine animals
Maribacter	AF468428	500m depth water samples filtered on	Marine plants
Maribacter	AF493682	Cystoseira compressa	Marine animals
Maribacter	AB180387	500m depth water samples filtered on	Sea water
Maribacter	AB365064	500m depth water samples filtered on	Sea water
Maribacter	AB526333	500m depth water samples filtered on	Sea water
Maribacter	AB712337	Cystoseira compressa	Marine animals
Maribacter	AF235126	Cystoseira compressa	Marine animals
Maribacter	AF359541	500m depth water samples filtered on	Sea water
Maribacter	AF367849	rotifer (Brachionus plicatilis sp.	Marine animals
Maribacter	AF468227	500m depth water samples filtered on	Sea water
Maribacter	AF468244	500m depth water samples filtered on	Sea water
Maribacter	AF468265	arthropod integument surfaces	Marine animals
Maribacter	AF468408	500m depth water samples filtered on	Sea water
Maribacter	AF468420	500m depth water samples filtered on	Sea water
Maribacter	AF468428	arthropod integument surfaces	Marine animals
Maribacter	AF493682	Cystoseira compressa	Marine animals
Maribacter	AB180387	seaweed bed water samples	Marine plants
Maribacter	AB365064	macro-algae surface	Marine plants
Maribacter	AB526333	macro-algae surface	Marine plants
Maribacter	AB712337	South China Sea	Sea water
Maribacter	AF235126	sediment	Marine sediments
Maribacter	AF359541	South China Sea	Sea water
Maribacter	AF367849	Western English Channel	Sea water
Maribacter	AF468227	marine sediment	Marine sediments
Maribacter	AF468244	cultivation of Karlodinium micrum	Marine plants
Maribacter	AF468265	Antarctic macroalga surface	Marine plants
Maribacter	AF468408	sediment	Marine sediments
Maribacter	AF468420	Marine bacterium	Sea water
Maribacter	AF468428	seawater, Jeju	Sea water
Maribacter	AF493682	marine electroactive biofilm	Salinewater sedimnets,mats and soil
Maribacter	AB180387	seawater	Sea water
Maribacter	AB365064	coral mucus	Marine animals
Maribacter	AB526333	sediment	Marine sediments
Maribacter	AB712337	water sample	Fresh water
Maribacter	AF235126	aquatic microbial mat	Freshwater sedimnets,mats and soil
Maribacter	AF359541	South China Sea	Sea water
Maribacter	AF367849	South China Sea	Sea water
Maribacter	AF468227	biofilm of recirculating aquaculture	Marine animals
Maribacter	AF468244	sea water	Sea water
Maribacter	AF468265	lobster shell disease lesion	Marine animals
Maribacter	AF468408	lobster shell disease lesion	Marine animals
Maribacter	AF468420	arctic marine sediment	Marine sediments
Maribacter	AF468428	South China Sea	Sea water
Maribacter	AF493682	coastal sea-ice	Sea water
Maribacter	AB180387	cultivation of Karlodinium micrum	Marine plants
Maribacter	AB365064	South China Sea	Sea water
Maribacter	AB526333	microbial community of a marine sponge	Marine animals
Maribacter	AB712337	microbial community of a marine sponge	Marine animals
Maribacter	AF235126	microbial community of a marine sponge	Marine animals
Maribacter	AF359541	microbial community of a marine sponge	Marine animals
Maribacter	AF367849	microbial community of a marine sponge	Marine animals
Maribacter	AF468227	soil	Freshwater sedimnets,mats and soil
Maribacter	AF468244	dam lake	Saline water
Maribacter	AF468265	surface of Island	Marine sediments
Maribacter	AF468408	seawater from the Mariana Trench	Sea water
Maribacter	AF468420	seawater	Sea water
Maribacter	AF468428	soil	Freshwater sedimnets,mats and soil
Maribacter	AF493682	Cystoseira compressa"	Marine animals
Maribacter	AB180387	Cystoseira compressa	Marine animals
Maribacter	AB365064	soil	Freshwater sedimnets,mats and soil
Maribacter	AB526333	soil	Freshwater sedimnets,mats and soil
Maribacter	AB712337	marine sediment	Marine sediments
Maribacter	AF235126	sediment	Marine sediments
Maribacter	AF359541	Trichodesmium erythraeum colonies	Marine animals
Maribacter	AF367849	gut	Marine animals
Maribacter	AF468227	gut from red palm weevil in November	Marine animals
Maribacter	AF468244	gut	Marine animals
Maribacter	AF468265	gut	Marine animals
Maribacter	AF468408	gut from red palm weevil in November	Marine animals
Maribacter	AF468420	gut from red palm weevil in November	Marine animals
Maribacter	AF468428	gut	Marine animals
Maribacter	AF493682	gut	Marine animals
Maribacter	AB180387	gut from red palm weevil in November	Marine animals
Maribacter	AB365064	gut	Marine animals
Maribacter	AB526333	gut	Marine animals
Maribacter	AB712337	gut	Marine animals
Maribacter	AF235126	gut from red palm weevil in November	Marine animals
Maribacter	AF359541	gut	Marine animals
Maribacter	AF367849	sea soil	Marine sediments
Maribacter	AF468227	host hemolymph	Marine animals
Maribacter	AF468244	host hemolymph	Marine animals
Maribacter	AF468265	Lagoon sediment	Salinewater sedimnets,mats and soil
Maribacter	AF468408	Cystoseira compressa	Marine animals
Maribacter	AF468420	Cystoseira compressa	Marine animals
Maribacter	AF468428	Cystoseira compressa	Marine animals
Maribacter	AF493682	Crude oil polluted soil	Hydrocarbon polluted sediments and soil
Maribacter	AB180387	Sediment at 50m from Karankadu Coastal_x000D_ solation_source=Gut microbiota of Seriola rivoliana"	Marine animals
Maribacter	AB365064	biofilm	Freshwater sedimnets,mats and soil
Maribacter	AB526333	water sample	Fresh water
Maribacter	AB712337	biofilm	Freshwater sedimnets,mats and soil
Maribacter	AF235126	Near shore sediment from Karankadu	Marine sediments
Maribacter	AF359541	Gut microbiota of Seriola rivoliana	Marine animals
Maribacter	AF367849	biofilm	Freshwater sedimnets,mats and soil
Maribacter	AF468227	sediments	Marine sediments
Maribacter	AF468244	Litopenaeus vannamei. gut"	Marine animals
Maribacter	AF468265	sediments	Freshwater sedimnets,mats and soil
Maribacter	FJ809290	tissue Montipora	Marine animals
Maribacter	FJ952751	healthy tissue	Marine animals
Maribacter	GQ450021	intertidal sediment	Marine sediments
Maribacter	GQ903269	intertidal estuarine sediment	Marine sediments
Maribacter	GQ903316	intertidal estuarine sediment	Marine sediments
Maribacter	GU061241	Yellow Sea intertidal beach seawater at 5 m depth	Marine sediments
Maribacter	GU061313	Yellow Sea intertidal beach seawater at 20 m depth	Marine sediments
Maribacter	HM598565	brackish sediments contaminated with hydrocarbons and heavy metals at 3 m water dept	Hydrocarbon polluted sediments and soil
Maribacter	HQ847942	Callyspongia diffusa	Marine animals
Maribacter	JN696062	Yellow Sea	Sea water
Maribacter	JQ579683	sediments from Figueiras Beach	Marine sediments
Maribacter	JQ579710	sediments from Figueiras Beach	Marine sediments
Maribacter	JQ579731	sediments from Figueiras Beach	Marine sediments
Maribacter	JQ579733	sediments from Figueiras Beach	Marine sediments
Maribacter	JQ579754	sediments from Figueiras Beach	Marine sediments
Maribacter	JQ579778	sediments from Figueiras Beach	Marine sediments
Maribacter	JQ579800	sediments from Figueiras Beach	Marine sediments
Maribacter	JQ579822	sediments from Figueiras Beach	Marine sediments
Maribacter	JQ579875	sediments from Figueiras Beach	Marine sediments
Maribacter	JQ579913	sediments from Figueiras Beach	Marine sediments
Maribacter	JQ579923	sediments from Figueiras Beach	Marine sediments
Maribacter	JQ579993	sediments from Figueiras Beach	Marine sediments
Maribacter	JQ580162	sediments from Rodas Beach polluted with crude oil	Hydrocarbon polluted sediments and soil
Maribacter	JQ580363	sediments from Rodas Beach polluted with crude oil	Hydrocarbon polluted sediments and soil
Maribacter	JX041738	beach sediment	Marine sediments
Maribacter	JX162139	highly copper-contaminated marine sediment	Heavy metal polluted sediments and soil
Maribacter	JX193428	intertidal surface sediment	Marine sediments
Maribacter	KC508717	seawater	Sea water
Maribacter	KC839612	seawater from the Mariana Trench	Sea water
Maribacter	KF268698	marine sediment	Marine sediments
Maribacter	KR825219	Janssand tidal subsurface sediment, 490 cmbsf	Marine sediments
Maribacter	KU624941	seaweed (Asparagopsis)	Marine plants
Maribacter	KU690309	Cystoseira compressa	Marine animals
Maribacter	KU691695	Cystoseira compressa	Marine animals
Maribacter	KX603053	Coast of Barcelona	Marine sediments
Maribacter	KY190826	marine sediment from Potter Cove, King George Island	Marine sediments
Maribacter	KY577744	Orbicella faveolata with black band disease	Marine animals
Maribacter	LT171393	host hemolymph	Marine animals
Maribacter	MG182666	soil	Freshwater sedimnets,mats and soil
Maribacter	LN881399	coastal seawater surface	Sea water
Maribacter	LN881400	holdfast of unattached brown algae	Marine plants
